# Supplementary material for: Personal Health Information Inference Using Machine Learning on RNA Expression Data from Patients With Cancer: Algorithm Validation Study
Source: PubMed Central journal article supplement (PMC7445622; doi:10.2196/18387), 2020-08-10
Supplement: jmir_v22i8e18387_app1.pdf [file jmir_v22i8e18387_app1.pdf]

Three datasets with T-test and ANOVA

| Model  | Feature     | Sample, n | p value* (gene, n) |       |       |
|--------|-------------|-----------|--------------------|-------|-------|
|        |             |           | Total              | <0.05 | <0.01 |
| T-test | Gender      | 7,828     | 12,897             | 6,186 | 5,798 |
| ANOVA  | Age         | 7,828     | 12,897             | 8,315 | 8,017 |
| ANOVA  | Race        | 7,828     | 12,897             | 6,000 | 5,542 |
| ANOVA  | Cancer type | 7,828     | 12,897             | 8,917 | 8,646 |
| ANOVA  | Stage       | 5,485     | 12,897             | 7,251 | 6,880 |

\* with Bonferroni's post hoc test
