# Supplementary material for: Personal Health Information Inference Using Machine Learning on RNA Expression Data from Patients With Cancer: Algorithm Validation Study
Source: PubMed Central journal article supplement (PMC7445622; doi:10.2196/18387), 2020-08-10
Supplement: jmir_v22i8e18387_app2.pdf [file jmir_v22i8e18387_app2.pdf]

BRCA's Machine learnings accuracy and AUC result table.

| Features | Classes   | Machine learning algorithms |        |          |               |        |          |               |        |          |                |        |          | Support samples |      |
|----------|-----------|-----------------------------|--------|----------|---------------|--------|----------|---------------|--------|----------|----------------|--------|----------|-----------------|------|
|          |           | Support vector machine      |        |          | Decision tree |        |          | Random forest |        |          | Neural network |        |          |                 |      |
|          |           | precision                   | recall | f1-score | precision     | recall | f1-score | precision     | recall | f1-score | precision      | recall | f1-score | Train           | Test |
| Gender   | Female    | 0.99                        | 1      | 0.99     | 1             | 1      | 1        | 0.99          | 1      | 0.99     | 0.99           | 1      | 0.99     | 662             | 284  |
|          | Male      | 0                           | 0      | 0        | 1             | 1      | 1        | 0             | 0      | 0        | na             | 0      | 0        | 7               | 4    |
| Age      | 20        | 0.01                        | 0.5    | 0.02     | 0             | 0      | 0        | 0.01          | 1      | 0.01     | na             | 0      | 0        | 6               | 2    |
|          | 30        | 0.2                         | 0.06   | 0.1      | 0.06          | 0.06   | 0.06     | 0             | 0      | 0        | 0.38           | 0.19   | 0.25     | 44              | 16   |
|          | 40        | 0.39                        | 0.4    | 0.39     | 0.29          | 0.28   | 0.29     | 0             | 0      | 0        | na             | 0      | 0        | 144             | 53   |
|          | 50        | 0.18                        | 0.15   | 0.16     | 0.24          | 0.27   | 0.25     | 0             | 0      | 0        | 0.31           | 0.72   | 0.44     | 184             | 74   |
|          | 60        | 0.35                        | 0.23   | 0.27     | 0.28          | 0.24   | 0.26     | 0             | 0      | 0        | 0.38           | 0.53   | 0.44     | 164             | 80   |
|          | 70        | 0.22                        | 0.11   | 0.15     | 0.25          | 0.23   | 0.24     | 0             | 0      | 0        | na             | 0      | 0        | 91              | 44   |
|          | 80        | 0                           | 0      | 0        | 0.06          | 0.06   | 0.06     | 0             | 0      | 0        | na             | 0      | 0        | 34              | 18   |
|          | 90        | 0                           | 0      | 0        | 0             | 0      | 0        | 0             | 0      | 0        | na             | 0      | 0        | 2               | 1    |
| Race     | ASIAN     | 0.67                        | 0.83   | 0.74     | 0             | 0      | 0        | 0             | 0      | 0        | 0.22           | 0.17   | 0.19     | 36              | 12   |
|          | BLACK     | 0.98                        | 0.84   | 0.9      | 0.48          | 0.6    | 0.53     | 0.9           | 0.36   | 0.51     | 0.97           | 0.66   | 0.79     | 127             | 50   |
|          | WHITE     | 0.96                        | 0.98   | 0.97     | 0.86          | 0.77   | 0.82     | 0.86          | 0.94   | 0.9      | 0.90           | 0.98   | 0.94     | 506             | 226  |
| Stage    | Stage I   | 0.24                        | 0.47   | 0.32     | 0.18          | 0.33   | 0.24     | 0.21          | 0.24   | 0.22     | 0.39           | 0.29   | 0.34     | 121             | 51   |
|          | Stage II  | 0.6                         | 0.53   | 0.56     | 0.58          | 0.65   | 0.61     | 0.58          | 0.52   | 0.55     | 0.63           | 0.54   | 0.58     | 381             | 156  |
|          | Stage III | 0.41                        | 0.25   | 0.31     | 0             | 0      | 0        | 0.2           | 0.25   | 0.22     | 0.26           | 0.45   | 0.32     | 161             | 56   |
|          | Stage IV  | 0                           | 0      | 0        | 0             | 0      | 0        | 0             | 0      | 0        | na             | 0      | 0        | 8               | 6    |

KIRC's Machine learnings accuracy and AUC result table.

| Features | Classes   | Machine learning algorithms |        |          |               |        |          |               |        |          |                |        |          | Support samples |      |
|----------|-----------|-----------------------------|--------|----------|---------------|--------|----------|---------------|--------|----------|----------------|--------|----------|-----------------|------|
|          |           | Support vector machine      |        |          | Decision tree |        |          | Random forest |        |          | Neural network |        |          |                 |      |
|          |           | precision                   | recall | f1-score | precision     | recall | f1-score | precision     | recall | f1-score | precision      | recall | f1-score | Train           | Test |
| Gender   | Female    | 1                           | 0.95   | 0.97     | 0.92          | 0.93   | 0.92     | 0.97          | 0.55   | 0.7      | 0.87           | 0.22   | 0.36     | 125             | 58   |
|          | Male      | 0.97                        | 1      | 0.98     | 0.96          | 0.95   | 0.95     | 0.79          | 0.99   | 0.88     | 0.68           | 0.98   | 0.80     | 238             | 98   |
| Age      | 20        | 0.01                        | 0.5    | 0.02     | 0             | 0      | 0        | 0.01          | 1      | 0.03     | na             | 0      | 0.00     | 0               | 2    |
|          | 30        | 0                           | 0      | 0        | 0             | 0      | 0        | 0             | 0      | 0        | na             | 0      | 0.00     | 11              | 4    |
|          | 40        | 0.2                         | 0.04   | 0.07     | 0.2           | 0.22   | 0.21     | 0             | 0      | 0        | 0.33           | 0.04   | 0.08     | 63              | 23   |
|          | 50        | 0.17                        | 0.05   | 0.08     | 0.27          | 0.26   | 0.27     | 0             | 0      | 0        | 0.31           | 0.29   | 0.30     | 98              | 38   |
|          | 60        | 0.5                         | 0.06   | 0.11     | 0.34          | 0.32   | 0.33     | 0             | 0      | 0        | 0.35           | 0.24   | 0.29     | 99              | 50   |
|          | 70        | 0.33                        | 0.06   | 0.11     | 0.05          | 0.06   | 0.06     | 0             | 0      | 0        | 0.29           | 0.75   | 0.41     | 75              | 32   |
|          | 80        | 0                           | 0      | 0        | 0             | 0      | 0        | 0             | 0      | 0        | na             | 0      | 0.00     | 17              | 7    |
| Race     | ASIAN     | 0                           | 0      | 0        | 0             | 0      | 0        | 0.33          | 0.33   | 0.33     | na             | 0      | 0.00     | 5               | 3    |
|          | BLACK     | 0.68                        | 0.59   | 0.63     | 0.24          | 0.18   | 0.21     | 0.75          | 0.14   | 0.23     | 0.75           | 0.27   | 0.40     | 33              | 22   |
|          | WHITE     | 0.93                        | 0.95   | 0.94     | 0.86          | 0.9    | 0.88     | 0.87          | 0.98   | 0.92     | 0.87           | 0.98   | 0.92     | 325             | 131  |
| Stage    | Stage I   | 0.51                        | 0.38   | 0.43     | 0.53          | 1      | 0.69     | 0.67          | 0.03   | 0.05     | 0.58           | 0.84   | 0.68     | 170             | 80   |
|          | Stage II  | 0.12                        | 0.25   | 0.16     | 0             | 0      | 0        | 0.14          | 0.7    | 0.24     | 0.10           | 0.1    | 0.10     | 33              | 20   |
|          | Stage III | 0.22                        | 0.38   | 0.28     | 0             | 0      | 0        | 0.2           | 0.34   | 0.25     | 0.33           | 0.03   | 0.06     | 91              | 29   |
|          | Stage IV  | 0                           | 0      | 0        | 0             | 0      | 0        | 0             | 0      | 0        | 0.17           | 0.09   | 0.11     | 58              | 23   |

HNSC's Machine learnings accuracy and AUC result table.

| Features | Classes                          | Machine learning algorithms |        |          |               |        |          |               |        |          |                |        |          | Support samples |      |
|----------|----------------------------------|-----------------------------|--------|----------|---------------|--------|----------|---------------|--------|----------|----------------|--------|----------|-----------------|------|
|          |                                  | Support vector machine      |        |          | Decision tree |        |          | Random forest |        |          | Neural network |        |          |                 |      |
|          |                                  | precision                   | recall | f1-score | precision     | recall | f1-score | precision     | recall | f1-score | precision      | recall | f1-score | Train           | Test |
| Gender   | Female                           | 0.97                        | 0.97   | 0.97     | 0.95          | 1      | 0.97     | 0.8           | 0.21   | 0.33     | 0.68           | 0.34   | 0.46     | 94              | 38   |
|          | Male                             | 0.99                        | 0.99   | 0.99     | 1             | 0.98   | 0.99     | 0.78          | 0.98   | 0.87     | 0.81           | 0.95   | 0.87     | 253             | 111  |
| Age      | 20                               | 0                           | 0      | 0        | 0             | 0      | 0        | 0.03          | 1      | 0.06     | na             | 0      | 0        | 2               | 4    |
|          | 30                               | 0                           | 0      | 0        | 0             | 0      | 0        | 0             | 0      | 0        | na             | 0      | 0        | 9               | 2    |
|          | 40                               | 0.17                        | 0.06   | 0.08     | 0.05          | 0.06   | 0.05     | 0             | 0      | 0        | 0.07           | 0.11   | 0.09     | 42              | 18   |
|          | 50                               | 0.44                        | 0.32   | 0.37     | 0.3           | 0.23   | 0.26     | 0.5           | 0.07   | 0.12     | 0.25           | 0.34   | 0.29     | 98              | 44   |
|          | 60                               | 0.31                        | 0.28   | 0.3      | 0.38          | 0.5    | 0.43     | 0.25          | 0.02   | 0.04     | 0.28           | 0.33   | 0.30     | 124             | 46   |
|          | 70                               | 0.2                         | 0.04   | 0.07     | 0.15          | 0.16   | 0.16     | 0             | 0      | 0        | 0.2            | 0.08   | 0.11     | 52              | 25   |
|          | 80                               | 1                           | 0.1    | 0.18     | 0             | 0      | 0        | 0             | 0      | 0        | na             | 0      | 0        | 20              | 10   |
| Race     | NATIVE AMERICAN OR ALASKA NATIVE | 0                           | 0      | 0        | 0             | 0      | 0        | 0             | 0      | 0        | 0              | 0      | 0        | 1               | 1    |
|          | ASIAN                            | 0                           | 0      | 0        | 0             | 0      | 0        | 0             | 0      | 0        | na             | 0      | 0        | 8               | 3    |
|          | BLACK                            | 0.8                         | 0.29   | 0.42     | 0.29          | 0.36   | 0.32     | 0.63          | 0.16   | 0.38     | 0.33           | 0.07   | 0.12     | 31              | 14   |
|          | WHITE                            | 0.93                        | 0.97   | 0.95     | 0.9           | 0.87   | 0.89     | 0.87          | 0.43   | 0.81     | 0.88           | 0.98   | 0.93     | 307             | 131  |
| Stage    | Stage I                          | 0.17                        | 0.56   | 0.26     | 0.12          | 0.44   | 0.2      | 0.13          | 0.22   | 0.17     | na             | 0      | 0        | 14              | 9    |
|          | Stage II                         | 0.3                         | 0.16   | 0.21     | 0             | 0      | 0        | 0.22          | 0.26   | 0.24     | 0.33           | 0.16   | 0.21     | 48              | 19   |
|          | Stage III                        | 0.22                        | 0.1    | 0.13     | 0             | 0      | 0        | 0.17          | 0.14   | 0.15     | 0.33           | 0.29   | 0.31     | 46              | 21   |
|          | Stage IV                         | 0.71                        | 0.71   | 0.71     | 0.59          | 0.75   | 0.66     | 0.61          | 0.54   | 0.57     | 0.67           | 0.90   | 0.77     | 153             | 63   |

LGG's Machine learnings accuracy and AUC result table.

| Features | Classes | Machine learning algorithms |        |          |               |        |          |               |        |          |                |        |          | Support samples |      |
|----------|---------|-----------------------------|--------|----------|---------------|--------|----------|---------------|--------|----------|----------------|--------|----------|-----------------|------|
|          |         | Support vector machine      |        |          | Decision tree |        |          | Random forest |        |          | Neural network |        |          |                 |      |
|          |         | precision                   | recall | f1-score | precision     | recall | f1-score | precision     | recall | f1-score | precision      | recall | f1-score | Train           | Test |
| Gender   | Female  | 1                           | 1      | 1        | 0.98          | 0.98   | 0.98     | 0.85          | 0.9    | 0.87     | 0.68           | 0.77   | 0.72     | 157             | 61   |
|          | Male    | 1                           | 1      | 1        | 0.99          | 0.99   | 0.99     | 0.93          | 0.88   | 0.9      | 0.82           | 0.74   | 0.78     | 183             | 85   |
| Age      | 10      | 0.01                        | 0.25   | 0.02     | 0             | 0      | 0        | 0.03          | 1      | 0.05     | na             | 0      | 0        | 0               | 4    |
|          | 20      | 0.6                         | 0.38   | 0.46     | 0.17          | 0.44   | 0.25     | 0             | 0      | 0        | na             | 0      | 0        | 55              | 16   |
|          | 30      | 0.56                        | 0.09   | 0.16     | 0.63          | 0.4    | 0.49     | 1             | 0.02   | 0.04     | 0.49           | 0.73   | 0.58     | 96              | 55   |
|          | 40      | 0                           | 0      | 0        | 0.17          | 0.11   | 0.13     | 0             | 0      | 0        | 0.25           | 0.14   | 0.18     | 68              | 37   |
|          | 50      | 0.25                        | 0.07   | 0.11     | 0.16          | 0.36   | 0.22     | 0             | 0      | 0        | 0.25           | 0.79   | 0.38     | 75              | 14   |
|          | 60      | 0                           | 0      | 0        | 0.23          | 0.18   | 0.2      | 0             | 0      | 0        | na             | 0      | 0        | 34              | 17   |
|          | 70      | 0                           | 0      | 0        | 0             | 0      | 0        | 0             | 0      | 0        | na             | 0      | 0        | 12              | 3    |
| Race     | ASIAN   | 0                           | 0      | 0        | 0             | 0      | 0        | 0             | 0      | 0        | na             | 0      | 0        | 4               | 4    |
|          | BLACK   | 0                           | 0      | 0        | 0.17          | 0.25   | 0.2      | 0             | 0      | 0        | na             | 0      | 0        | 17              | 4    |
|          | WHITE   | 0.94                        | 0.99   | 0.97     | 0.96          | 0.93   | 0.95     | 0.95          | 1      | 0.97     | 0.95           | 1      | 0.97     | 319             | 138  |

LUAD's Machine learnings accuracy and AUC result table.

| Features | Classes   | Machine learning algorithms |        |          |               |        |          |               |        |          |                |        |          | Support samples |      |
|----------|-----------|-----------------------------|--------|----------|---------------|--------|----------|---------------|--------|----------|----------------|--------|----------|-----------------|------|
|          |           | Support vector machine      |        |          | Decision tree |        |          | Random forest |        |          | Neural network |        |          |                 |      |
|          |           | precision                   | recall | f1-score | precision     | recall | f1-score | precision     | recall | f1-score | precision      | recall | f1-score | Train           | Test |
| Gender   | Female    | 1                           | 1      | 1        | 0.99          | 1      | 0.99     | 0.77          | 0.82   | 0.79     | 0.77           | 0.662  | 0.71     | 160             | 71   |
|          | Male      | 1                           | 1      | 1        | 1             | 0.98   | 0.99     | 0.74          | 0.69   | 0.71     | 0.63           | 0.7407 | 0.68     | 131             | 54   |
| Age      | 40        | 0.04                        | 0.33   | 0.07     | 0.12          | 0.17   | 0.14     | 0.05          | 1      | 0.09     | na             | 0      | 0        | 21              | 6    |
|          | 50        | 0.41                        | 0.5    | 0.45     | 0.22          | 0.27   | 0.24     | 0             | 0      | 0        | 0.27           | 0.3077 | 0.29     | 65              | 26   |
|          | 60        | 0.5                         | 0.19   | 0.28     | 0.45          | 0.33   | 0.38     | 0             | 0      | 0        | 0.45           | 0.5962 | 0.51     | 86              | 52   |
|          | 70        | 0.45                        | 0.26   | 0.33     | 0.31          | 0.37   | 0.34     | 0.33          | 0.03   | 0.05     | 0.38           | 0.2857 | 0.33     | 100             | 35   |
|          | 80        | 0                           | 0      | 0        | 0             | 0      | 0        | 0             | 0      | 0        | na             | 0      | 0        | 19              | 6    |
| Race     | ASIAN     | 0.25                        | 0.5    | 0.33     | 0             | 0      | 0        | 0             | 0      | 0        | na             | 0      | 0        | 5               | 2    |
|          | BLACK     | 0.8                         | 0.33   | 0.47     | 0.17          | 0.17   | 0.17     | 0             | 0      | 0        | 0.4            | 0.1667 | 0.24     | 35              | 12   |
|          | WHITE     | 0.96                        | 1      | 0.98     | 0.89          | 0.91   | 0.9      | 0.9           | 1      | 0.94     | 0.9            | 0.973  | 0.94     | 251             | 111  |
| Stage    | Stage I   | 0.54                        | 0.95   | 0.69     | 0.49          | 1      | 0.66     | 0.47          | 0.34   | 0.4      | 0.51           | 0.8276 | 0.63     | 155             | 58   |
|          | Stage II  | 0.25                        | 0.06   | 0.09     | 0             | 0      | 0        | 0.34          | 0.33   | 0.34     | 0.38           | 0.1667 | 0.23     | 60              | 36   |
|          | Stage III | 0.22                        | 0.11   | 0.14     | 0             | 0      | 0        | 0.16          | 0.26   | 0.2      | 0.22           | 0.1053 | 0.14     | 46              | 19   |
|          | Stage IV  | 0                           | 0      | 0        | 0             | 0      | 0        | 0.1           | 0.17   | 0.12     | na             | 0      | 0        | 14              | 6    |
