# Supplementary material for: Personal Health Information Inference Using Machine Learning on RNA Expression Data from Patients With Cancer: Algorithm Validation Study
Source: PubMed Central journal article supplement (PMC7445622; doi:10.2196/18387), 2020-08-10
Supplement: jmir_v22i8e18387_app4.pdf [file jmir_v22i8e18387_app4.pdf]

Prediction performance of gender according to an independent gene set consisting of genes located on chromosomes 1-22 and X.

| Features | Genes  | Machine learning algorithms |        |               |        |               |        |                |        | Support samples |       |
|----------|--------|-----------------------------|--------|---------------|--------|---------------|--------|----------------|--------|-----------------|-------|
|          |        | Support vector machine      |        | Decision tree |        | Random forest |        | Neural network |        |                 |       |
|          |        | accuracy                    | AUC    | accuracy      | AUC    | accuracy      | AUC    | accuracy       | AUC    | Train           | Test  |
| Gender   | 12,883 | 0.9825                      | 0.9825 | 0.9634        | 0.9635 | 0.9133        | 0.9915 | 0.9662         | 0.9963 | 5,479           | 2,349 |

| Features | Classes | Machine learning algorithms |        |          |               |        |          |               |        |          |                |        |          | Support samples |      |
|----------|---------|-----------------------------|--------|----------|---------------|--------|----------|---------------|--------|----------|----------------|--------|----------|-----------------|------|
|          |         | Support vector machine      |        |          | Decision tree |        |          | Random forest |        |          | Neural network |        |          |                 |      |
|          |         | precision                   | recall | f1-score | precision     | recall | f1-score | precision     | recall | f1-score | precision      | recall | f1-score | Train           | Test |
| Gender   | Female  | 0.98                        | 0.98   | 0.98     | 0.97          | 0.96   | 0.96     | 0.97          | 0.98   | 0.96     | 0.99           | 0.95   | 0.97     | 2774            | 1272 |
|          | Male    | 0.98                        | 0.98   | 0.98     | 0.96          | 0.97   | 0.96     | 0.96          | 0.97   | 0.96     | 0.94           | 0.99   | 0.97     | 2705            | 1077 |

Prediction performance of gender according to an independent gene set consisting of significant genes located on chromosomes 1-22 and X selected through statistical analysis.

| Features | Genes | Machine learning algorithms |        |               |        |               |        |                |        | Support samples |       |
|----------|-------|-----------------------------|--------|---------------|--------|---------------|--------|----------------|--------|-----------------|-------|
|          |       | Support vector machine      |        | Decision tree |        | Random forest |        | Neural network |        |                 |       |
|          |       | accuracy                    | AUC    | accuracy      | AUC    | accuracy      | AUC    | accuracy       | AUC    | Train           | Test  |
| Gender   | 5,790 | 0.9834                      | 0.9833 | 0.9613        | 0.9613 | 0.9137        | 0.9915 | 0.9483         | 0.9950 | 5,479           | 2,349 |

| Features | Classes | Machine learning algorithms |        |          |               |        |          |               |        |          |                |        |          | Support samples |      |
|----------|---------|-----------------------------|--------|----------|---------------|--------|----------|---------------|--------|----------|----------------|--------|----------|-----------------|------|
|          |         | Support vector machine      |        |          | Decision tree |        |          | Random forest |        |          | Neural network |        |          |                 |      |
|          |         | precision                   | recall | f1-score | precision     | recall | f1-score | precision     | recall | f1-score | precision      | recall | f1-score | Train           | Test |
| Gender   | Female  | 0.98                        | 0.99   | 0.98     | 0.97          | 0.96   | 0.96     | 0.97          | 0.98   | 0.98     | 0.99           | 0.91   | 0.95     | 2774            | 1272 |
|          | Male    | 0.99                        | 0.98   | 0.98     | 0.96          | 0.96   | 0.96     | 0.98          | 0.97   | 0.97     | 0.91           | 0.99   | 0.95     | 2705            | 1077 |

Prediction performance of gender according to independent gene set consisting of genes located on chromosomes 1-22 and X by top five ranked cancer type

| Cancer type | Features | Machine learning algorithms |        |               |        |               |        |                |        | Support samples |      |
|-------------|----------|-----------------------------|--------|---------------|--------|---------------|--------|----------------|--------|-----------------|------|
|             |          | Support vector machine      |        | Decision tree |        | Random forest |        | Neural network |        |                 |      |
|             |          | accuracy                    | AUC    | accuracy      | AUC    | accuracy      | AUC    | accuracy       | AUC    | Train           | Test |
| BRCA        | Gender   | 0.9861                      | 0.5000 | 1.0000        | 1.0000 | 0.9861        | 0.5000 | 0.9861         | 0.7676 | 669             | 288  |
| KIRC        | Gender   | 0.9808                      | 0.9741 | 0.9423        | 0.94   | 0.8077        | 0.7578 | 0.6987         | 0.889  | 363             | 156  |
| HNSC        | Gender   | 0.9866                      | 0.9823 | 0.9866        | 0.991  | 0.7785        | 0.5897 | 0.7919         | 0.8281 | 347             | 149  |
| LGG         | Gender   | 1.0000                      | 1.0000 | 0.9863        | 0.9859 | 0.8630        | 0.8756 | 0.7534         | 0.8469 | 340             | 146  |
| LUAD        | Gender   | 1.0000                      | 1.0000 | 0.9920        | 0.9907 | 0.7280        | 0.7555 | 0.6960         | 0.7160 | 291             | 125  |

| Cancer type | Features | Classes | Machine learning algorithms |        |          |               |        |          |               |        |          |                |        |          | Support samples |      |     |
|-------------|----------|---------|-----------------------------|--------|----------|---------------|--------|----------|---------------|--------|----------|----------------|--------|----------|-----------------|------|-----|
|             |          |         | Support vector machine      |        |          | Decision tree |        |          | Random forest |        |          | Neural network |        |          |                 |      |     |
|             |          |         | precision                   | recall | f1-score | precision     | recall | f1-score | precision     | recall | f1-score | precision      | recall | f1-score | Train           | Test |     |
| BRCA        | Gender   | Female  | 0.98                        | 1.00   | 0.99     | 1.00          | 1.00   | 1.00     | 1.00          | 1.00   | 1.00     | 1.00           | 0.97   | 1.00     | 0.99            | 662  | 284 |
|             |          | Male    | 0                           | 0      | 0        | 1.00          | 0.80   | 0.89     | 1.00          | 0.80   | 0.89     | 0              | 0      | 0        | 7               | 4    |     |
| KIRC        | Gender   | Female  | 0.96                        | 0.90   | 0.93     | 0.89          | 0.90   | 0.89     | 0.91          | 0.95   | 0.93     | 0.90           | 0.40   | 0.55     | 125             | 58   |     |
|             |          | Male    | 0.94                        | 0.98   | 0.96     | 0.94          | 0.93   | 0.93     | 0.97          | 0.94   | 0.95     | 0.68           | 0.97   | 0.80     | 238             | 98   |     |
| HNSC        | Gender   | Female  | 1.00                        | 0.88   | 0.93     | 0.98          | 0.94   | 0.96     | 1.00          | 0.96   | 0.98     | 0.50           | 0.03   | 0.06     | 94              | 38   |     |
|             |          | Male    | 0.94                        | 1.00   | 0.97     | 0.97          | 0.99   | 0.98     | 0.98          | 1.00   | 0.99     | 0.68           | 0.99   | 0.81     | 253             | 111  |     |
| LGG         | Gender   | Female  | 1.00                        | 1.00   | 1.00     | 0.97          | 0.99   | 0.98     | 0.97          | 0.99   | 0.98     | 1.00           | 0.02   | 0.04     | 157             | 61   |     |
|             |          | Male    | 1.00                        | 1.00   | 1.00     | 0.99          | 0.97   | 0.98     | 1.00          | 0.97   | 0.99     | 0.54           | 1.00   | 0.70     | 183             | 85   |     |
| LUAD        | Gender   | Female  | 0.95                        | 1.00   | 0.97     | 0.92          | 0.97   | 0.95     | 0.96          | 0.97   | 0.95     | 0.66           | 0.51   | 0.57     | 160             | 71   |     |
|             |          | Male    | 1.00                        | 0.93   | 0.96     | 0.96          | 0.89   | 0.92     | 1.00          | 0.95   | 0.97     | 0.55           | 0.69   | 0.61     | 131             | 54   |     |
