# Supplementary material for: Personal Health Information Inference Using Machine Learning on RNA Expression Data from Patients With Cancer: Algorithm Validation Study
Source: PubMed Central journal article supplement (PMC7445622; doi:10.2196/18387), 2020-08-10
Supplement: jmir_v22i8e18387_app5.pdf [file jmir_v22i8e18387_app5.pdf]

Prediction performance of identifier according to independent gene set consisting of 12,897 genes.

| Features    | Classes                          | Machine learning algorithms |        |          |               |        |          |               |        |          |                |        |          | Support samples |      |
|-------------|----------------------------------|-----------------------------|--------|----------|---------------|--------|----------|---------------|--------|----------|----------------|--------|----------|-----------------|------|
|             |                                  | Support vector machine      |        |          | Decision tree |        |          | Random forest |        |          | Neural network |        |          | Train           | Test |
|             |                                  | precision                   | recall | f1-score | precision     | recall | f1-score | precision     | recall | f1-score | precision      | recall | f1-score |                 |      |
| Gender      | Female                           | 1                           | 0.99   | 0.99     | 1             | Train  | Test     | 0.98          | 0.91   | 0.94     | 0.99           | 1.00   | 0.99     | 2774            | 1272 |
|             | Male                             | 0.99                        | 1      | 0.99     | 0.99          | 0.99   | 0.99     | 0.9           | 0.97   | 0.94     | 1.00           | 0.99   | 0.99     | 2705            | 1077 |
| Age         | 10                               | 0                           | 0.22   | 0.01     | 0             | 0      | 0        | 0             | 1      | 0.01     | 0              | 0      | 0        | 21              | 9    |
|             | 20                               | 0.32                        | 0.25   | 0.28     | 0.17          | 0.17   | 0.17     | 0             | 0      | 0        | 0              | 0      | 0        | 185             | 76   |
|             | 30                               | 0.31                        | 0.21   | 0.25     | 0.2           | 0.19   | 0.2      | 0.45          | 0.03   | 0.05     | 0              | 0      | 0        | 401             | 185  |
|             | 40                               | 0.27                        | 0.26   | 0.26     | 0.18          | 0.21   | 0.19     | 0             | 0      | 0        | 0.27           | 0.60   | 0.37     | 773             | 307  |
|             | 50                               | 0.24                        | 0.22   | 0.23     | 0.27          | 0.29   | 0.28     | 0             | 0      | 0        | 0.28           | 0.41   | 0.34     | 1279            | 549  |
|             | 60                               | 0.32                        | 0.24   | 0.28     | 0.29          | 0.28   | 0.28     | 0.5           | 0      | 0        | 0.33           | 0.45   | 0.38     | 1451            | 644  |
|             | 70                               | 0.34                        | 0.21   | 0.26     | 0.27          | 0.23   | 0.25     | 0             | 0      | 0        | 0              | 0      | 0        | 1049            | 460  |
|             | 80                               | 0.07                        | 0.02   | 0.03     | 0.11          | 0.12   | 0.12     | 0             | 0      | 0        | 0              | 0      | 0        | 310             | 115  |
| Race        | 90                               | 0                           | 0      | 0        | 0             | 0      | 0        | 0             | 0      | 0        | 0              | 0      | 0        | 10              | 4    |
|             | NATIVE AMERICAN OR ALASKA NATIVE | 0.02                        | 0.2    | 0.03     | 0             | 0      | 0        | 0             | 0      | 0        | 0              | 0      | 0        | 15              | 5    |
|             | ASIAN                            | 0.94                        | 0.85   | 0.89     | 0.3           | 0.28   | 0.29     | 0.82          | 0.07   | 0.13     | 0.82           | 0.96   | 0.89     | 405             | 194  |
|             | BLACK                            | 0.97                        | 0.84   | 0.9      | 0.37          | 0.39   | 0.38     | 1             | 0      | 0.01     | 0.99           | 0.87   | 0.92     | 536             | 244  |
|             | NATIVE HAWAIIAN                  | 0                           | 0      | 0        | 0             | 0      | 0        | 0             | 0      | 0        | 0              | 0      | 0        | 3               | 4    |
| Cancer type | WHITE                            | 0.98                        | 0.98   | 0.98     | 0.86          | 0.86   | 0.86     | 0.83          | 0.99   | 0.9      | 0.98           | 0.99   | 0.98     | 4520            | 1902 |
|             | ACC                              | 1                           | 1      | 1        | 0.9           | 0.86   | 0.88     | 1             | 0.68   | 0.81     | 0              | 0      | 0        | 46              | 22   |
|             | BLCA                             | 0.67                        | 1      | 0.8      | 0.73          | 0.8    | 0.76     | 0.21          | 1      | 0.34     | 0.81           | 0.87   | 0.84     | 256             | 127  |
|             | BRCA                             | 1                           | 0.99   | 0.99     | 0.95          | 0.95   | 0.95     | 1             | 0.91   | 0.95     | 1.00           | 0.99   | 0.99     | 661             | 297  |

|      |      |      |      |      |      |      |      |      |      |      |      |      |     |     |
|------|------|------|------|------|------|------|------|------|------|------|------|------|-----|-----|
| CEC  | 1    | 0.92 | 0.96 | 0.66 | 0.58 | 0.62 | 1    | 0.35 | 0.51 | 0    | 0    | 0    | 163 | 94  |
| CHOL | 0.5  | 0.45 | 0.48 | 0.33 | 0.27 | 0.3  | 0    | 0    | 0    | 0    | 0    | 0    | 25  | 11  |
| COAD | 0.87 | 0.8  | 0.83 | 0.69 | 0.67 | 0.68 | 0.78 | 0.69 | 0.73 | 0.73 | 0.96 | 0.83 | 176 | 78  |
| DLBC | 1    | 1    | 1    | 0.79 | 0.79 | 0.79 | 1    | 0.86 | 0.92 | 0    | 0    | 0    | 26  | 20  |
| ESCA | 0.97 | 0.75 | 0.85 | 0.65 | 0.64 | 0.64 | 1    | 0.27 | 0.43 | 0    | 0    | 0    | 107 | 46  |
| GBM  | 1    | 0.96 | 0.98 | 0.96 | 0.98 | 0.97 | 1    | 0.92 | 0.96 | 0.89 | 0.15 | 0.26 | 94  | 46  |
| HNSC | 0.99 | 0.99 | 0.99 | 0.88 | 0.95 | 0.91 | 1    | 0.93 | 0.97 | 0.92 | 0.99 | 0.95 | 357 | 140 |
| KICH | 0.89 | 0.89 | 0.89 | 0.58 | 0.58 | 0.58 | 0.85 | 0.58 | 0.69 | 0    | 0    | 0    | 42  | 22  |
| KIRC | 0.97 | 0.95 | 0.96 | 0.86 | 0.91 | 0.89 | 0.97 | 0.89 | 0.93 | 0.94 | 0.94 | 0.94 | 371 | 149 |
| KIRP | 0.96 | 0.93 | 0.95 | 0.86 | 0.88 | 0.87 | 0.96 | 0.83 | 0.89 | 0.75 | 0.90 | 0.82 | 199 | 71  |
| LGG  | 0.99 | 0.98 | 0.99 | 0.99 | 0.98 | 0.98 | 0.98 | 0.98 | 0.98 | 0.75 | 0.99 | 0.85 | 366 | 122 |
| LHC  | 0.99 | 0.92 | 0.96 | 0.99 | 0.87 | 0.92 | 1    | 0.87 | 0.93 | 0.94 | 0.98 | 0.96 | 250 | 95  |
| LUAD | 0.92 | 0.96 | 0.94 | 0.81 | 0.75 | 0.78 | 0.96 | 0.69 | 0.8  | 0.72 | 0.93 | 0.81 | 284 | 134 |
| LUSC | 0.97 | 0.84 | 0.9  | 0.7  | 0.73 | 0.71 | 1    | 0.53 | 0.69 | 0.58 | 0.85 | 0.69 | 258 | 121 |
| MESO | 0.96 | 0.9  | 0.93 | 0.86 | 0.86 | 0.86 | 1    | 0.62 | 0.77 | 0.00 | 0.00 |      | 61  | 21  |
| OV   | 1    | 1    | 1    | 0.95 | 0.96 | 0.96 | 1    | 0.96 | 0.98 | 0.96 | 1.00 | 0.98 | 194 | 80  |
| PAAD | 1    | 0.98 | 0.99 | 0.75 | 0.78 | 0.76 | 1    | 0.74 | 0.85 | 0.86 | 1.00 | 0.93 | 124 | 50  |
| PCPG | 1    | 1    | 1    | 0.87 | 0.93 | 0.9  | 1    | 0.95 | 0.98 | 0.88 | 1.00 | 0.94 | 130 | 42  |
| PRAD | 1    | 1    | 1    | 0.98 | 0.98 | 0.98 | 1    | 0.98 | 0.99 | 1.00 | 1.00 | 1.00 | 101 | 52  |
| READ | 0.48 | 0.46 | 0.47 | 0.17 | 0.17 | 0.17 | 0    | 0    | 0    | 0    | 0.00 | 0.00 | 58  | 23  |
| SARC | 0.96 | 0.99 | 0.97 | 0.93 | 0.89 | 0.91 | 0.98 | 0.9  | 0.94 | 0.78 | 0.99 | 0.87 | 165 | 83  |
| SKCM | 1    | 0.88 | 0.94 | 0.58 | 0.73 | 0.64 | 1    | 0.62 | 0.76 | 0.37 | 0.85 | 0.51 | 68  | 33  |
| STAD | 0.94 | 0.98 | 0.96 | 0.86 | 0.84 | 0.85 | 0.91 | 0.85 | 0.88 | 0.72 | 1.00 | 0.84 | 251 | 103 |
| TGCT | 1    | 1    | 1    | 0.91 | 0.95 | 0.93 | 1    | 0.82 | 0.9  | 0.26 | 0.14 | 0.18 | 96  | 32  |
| THCA | 1    | 1    | 1    | 0.99 | 0.98 | 0.99 | 1    | 0.98 | 0.99 | 1.00 | 1.00 | 1.00 | 284 | 120 |
| THYM | 1    | 0.97 | 0.99 | 1    | 0.85 | 0.92 | 1    | 0.77 | 0.87 | 0.66 | 0.97 | 0.78 | 75  | 42  |
| UCEC | 0.87 | 0.92 | 0.89 | 0.82 | 0.84 | 0.83 | 0.96 | 0.59 | 0.73 | 0.84 | 0.84 | 0.84 | 108 | 45  |

|       |           |      |      |      |      |      |      |      |      |      |      |      |      |     |     |
|-------|-----------|------|------|------|------|------|------|------|------|------|------|------|------|-----|-----|
|       | UCS       | 1    | 0.64 | 0.78 | 0.29 | 0.36 | 0.32 | 0    | 0    | 0    | 0.67 | 0.14 | 0.24 | 42  | 14  |
|       | UVM       | 0.9  | 1    | 0.95 | 0.9  | 1    | 0.95 | 1    | 0.94 | 0.97 | 0    | 0    | 0    | 41  | 14  |
| Stage | Stage I   | 0.77 | 0.9  | 0.83 | 0.82 | 0.83 | 0.82 | 0.64 | 0.99 | 0.78 | 0.46 | 0.81 | 0.58 | 960 | 416 |
|       | Stage II  | 0.84 | 0.81 | 0.82 | 0.82 | 0.79 | 0.8  | 0.96 | 0.74 | 0.84 | 0.54 | 0.28 | 0.37 | 974 | 444 |
|       | Stage III | 0.84 | 0.76 | 0.8  | 0.72 | 0.76 | 0.74 | 0.99 | 0.68 | 0.81 | 0.32 | 0.21 | 0.25 | 775 | 285 |
|       | Stage IV  | 0.9  | 0.77 | 0.83 | 0.78 | 0.75 | 0.77 | 0.95 | 0.72 | 0.82 | 0.49 | 0.46 | 0.47 | 366 | 173 |
