# Supplementary material for: Personal Health Information Inference Using Machine Learning on RNA Expression Data from Patients With Cancer: Algorithm Validation Study
Source: PubMed Central journal article supplement (PMC7445622; doi:10.2196/18387), 2020-08-10
Supplement: jmir_v22i8e18387_app7.pdf [file jmir_v22i8e18387_app7.pdf]

Five types of cancers with large numbers of samples from the primary tumor dataset.

| Features                            | BRCA<br>(N=957) | KIRC<br>(N=519) | HNSC<br>(N=496) | LGG<br>(N=486) | LUAD<br>(N=416) |
|-------------------------------------|-----------------|-----------------|-----------------|----------------|-----------------|
| Gender, n (%)                       |                 |                 |                 |                |                 |
| Female                              | 946 (98.85)     | 183 (35.26)     | 132 (26.61)     | 218 (44.86)    | 231 (55.53)     |
| Male                                | 11 (1.15)       | 336 (64.74)     | 364 (73.39)     | 268 (55.14)    | 185 (44.47)     |
| Age, years, n (%)                   |                 |                 |                 |                |                 |
| 10                                  | 0 (0)           | 0 (0)           | 0 (0)           | 4 (0.82)       | 0 (0)           |
| 20                                  | 8 (0.84)        | 2 (0.39)        | 6 (1.21)        | 71 (14.61)     | 0 (0)           |
| 30                                  | 60 (6.27)       | 15 (2.89)       | 11 (2.22)       | 151 (31.07)    | 0 (0)           |
| 40                                  | 197 (20.59)     | 86 (16.57)      | 60 (12.1)       | 105 (21.6)     | 27 (6.49)       |
| 50                                  | 258 (26.96)     | 136 (26.2)      | 142 (28.63)     | 89 (18.31)     | 91 (21.88)      |
| 60                                  | 244 (25.5)      | 149 (28.71)     | 170 (34.27)     | 51 (10.49)     | 138 (33.17)     |
| 70                                  | 135 (14.11)     | 107 (20.62)     | 77 (15.52)      | 15 (3.09)      | 135 (32.45)     |
| 80                                  | 52 (5.43)       | 24 (4.62)       | 30 (6.05)       | 0 (0)          | 25 (6.01)       |
| 90                                  | 3 (0.31)        | 0 (0)           | 0 (0)           | 0 (0)          | 0 (0)           |
| Race, n (%)                         |                 |                 |                 |                |                 |
| NATIVE AMERICAN OR<br>ALASKA NATIVE | 732 (76.49)     | 456 (87.86)     | 438 (88.31)     | 457 (94.03)    | 362 (87.02)     |
| ASIAN                               | 177 (18.5)      | 55 (10.6)       | 45 (9.07)       | 21 (4.32)      | 47 (11.3)       |
| BLACK OR<br>AFRICAN AMERICAN        | 48 (5.02)       | 8 (1.54)        | 11 (2.22)       | 8 (1.65)       | 7 (1.68)        |
| WHITE                               | 0 (0)           | 0 (0)           | 2 (0.4)         | 0 (0)          | 0 (0)           |
| Cancer type, n (%)                  |                 |                 |                 |                |                 |
| Stage I                             | 172 (18.24)     | 263 (50.58)     | 25 (5.85)       | 0 (0)          | 228 (54.68)     |
| Stage II                            | 537 (56.95)     | 54 (10.38)      | 70 (16.39)      | 0 (0)          | 100 (23.98)     |
| Stage III                           | 217 (23.01)     | 121 (23.27)     | 73 (17.1)       | 0 (0)          | 68 (16.31)      |
| Stage IV                            | 17 (1.8)        | 82 (15.77)      | 259 (60.66)     | 0 (0)          | 21 (5.04)       |

The percent in parentheses of variable's stage may not add up to 100% due to the missing value.
